# Supplementary material for: Genetic variation of dopamine and serotonin function modulates the feedback-related negativity during altruistic punishment
Source: PubMed Central journal article supplement (PMC5462809; doi:10.1038/s41598-017-02594-3), 2017-06-07
Supplement: 41598_2017_2594_MOESM1_ESM.pdf [file 41598_2017_2594_MOESM1_ESM.pdf]

## Supplementary material

**Title:** Genetic variation of dopamine and serotonin function modulates the feedback-related negativity during altruistic punishment

**Authors:** Enge, Mothes, Fleischhauer, Reif, & Strobel

*Supplementary Table S1.* Main and interaction effects of within-subject factors, between-subject factors and covariates on FRN amplitude

|                                                                                                                    | <i>df</i> | <i>F</i> | <i>p</i> | $\eta_p^2$ |
|--------------------------------------------------------------------------------------------------------------------|-----------|----------|----------|------------|
| <b>Main effects of the between-subject factors and covariates</b>                                                  |           |          |          |            |
| Sex                                                                                                                | 1         | 1.072    | .307     | .028       |
| Subjective financial situation                                                                                     | 1         | 3.550    | .067     | .088       |
| 5-HTTLPR                                                                                                           | 1         | .270     | .606     | .007       |
| DRD4                                                                                                               | 1         | 1.105    | .300     | .029       |
| 5-HTTLPR × DRD4                                                                                                    | 1         | .002     | .961     | .000       |
| Error                                                                                                              | 37        |          |          |            |
| <b>Main effects of the within-subject factors and interactions with the between-subject factors and covariates</b> |           |          |          |            |
| Perspective                                                                                                        | 1         | .600     | .444     | .016       |
| Perspective × Sex                                                                                                  | 1         | .025     | .875     | .001       |
| Perspective × Subjective financial situation                                                                       | 1         | 1.880    | .179     | .048       |
| Perspective × 5-HTTLPR                                                                                             | 1         | .238     | .628     | .006       |
| Perspective × DRD4                                                                                                 | 1         | .814     | .373     | .022       |
| Perspective × 5-HTTLPR × DRD4                                                                                      | 1         | .172     | .680     | .005       |
| Error(Perspective)                                                                                                 | 37        |          |          |            |
| Fairness                                                                                                           | 1         | 1.073    | .307     | .028       |
| Fairness × Sex                                                                                                     | 1         | 1.406    | .243     | .037       |
| Fairness × Subjective financial situation                                                                          | 1         | .772     | .385     | .020       |
| Fairness × 5-HTTLPR                                                                                                | 1         | 4.473    | .041     | .108       |
| Fairness × DRD4                                                                                                    | 1         | 8.825    | .005     | .193       |
| Fairness × 5-HTTLPR × DRD4                                                                                         | 1         | .605     | .442     | .016       |
| Error(Fairness)                                                                                                    | 37        |          |          |            |
| Perspective × Fairness                                                                                             | 1         | .858     | .360     | .023       |
| Perspective × Fairness × Sex                                                                                       | 1         | .064     | .801     | .002       |
| Perspective × Fairness × Subjective financial situation                                                            | 1         | 1.794    | .189     | .046       |
| Perspective × Fairness × 5-HTTLPR                                                                                  | 1         | .059     | .809     | .002       |
| Perspective × Fairness × DRD4                                                                                      | 1         | 1.419    | .241     | .037       |
| Perspective × Fairness × 5-HTTLPR × DRD4                                                                           | 1         | .486     | .490     | .013       |
| Error(Perspective×Fairness)                                                                                        | 37        |          |          |            |

*Note.* Gray shaded cells = statistically significant effects.

*Supplementary Table S2.* Main and interaction effects of within-subject factors, between-subject factors and covariates on punishment behavior

|                                                                                                                    | <i>df</i> | <i>F</i> | <i>p</i> | $\eta_p^2$ |
|--------------------------------------------------------------------------------------------------------------------|-----------|----------|----------|------------|
| <b>Main effects of the between-subject factors and covariates</b>                                                  |           |          |          |            |
| Sex                                                                                                                | 1         | 3.381    | .074     | .084       |
| Subjective financial situation                                                                                     | 1         | 6.573    | .015     | .151       |
| 5-HTTLPR                                                                                                           | 1         | 1.745    | .195     | .045       |
| DRD4                                                                                                               | 1         | 2.284    | .139     | .058       |
| 5-HTTLPR × DRD4                                                                                                    | 1         | .078     | .782     | .002       |
| Error                                                                                                              | 37        |          |          |            |
| <b>Main effects of the within-subject factors and interactions with the between-subject factors and covariates</b> |           |          |          |            |
| Perspective                                                                                                        | 1         | .008     | .929     | .000       |
| Perspective × Sex                                                                                                  | 1         | .975     | .330     | .026       |
| Perspective × Subjective financial situation                                                                       | 1         | .001     | .918     | .000       |
| Perspective × 5-HTTLPR                                                                                             | 1         | .386     | .538     | .010       |
| Perspective × DRD4                                                                                                 | 1         | .499     | .484     | .013       |
| Perspective × 5-HTTLPR × DRD4                                                                                      | 1         | .410     | .526     | .011       |
| Error(Perspective)                                                                                                 | 37        |          |          |            |
| Fairness                                                                                                           | 1         | 8.939    | .005     | .195       |
| Fairness × Sex                                                                                                     | 1         | 2.286    | .139     | .058       |
| Fairness × Subjective financial situation                                                                          | 1         | 7.416    | .010     | .167       |
| Fairness × 5-HTTLPR                                                                                                | 1         | 4.311    | .045     | .104       |
| Fairness × DRD4                                                                                                    | 1         | 1.364    | .250     | .036       |
| Fairness × 5-HTTLPR × DRD4                                                                                         | 1         | .050     | .825     | .001       |
| Error(Fairness)                                                                                                    | 37        |          |          |            |
| Perspective × Fairness                                                                                             | 1         | .419     | .521     | .011       |
| Perspective × Fairness × Sex                                                                                       | 1         | 2.635    | .113     | .066       |
| Perspective × Fairness × Subjective financial situation                                                            | 1         | .206     | .653     | .006       |
| Perspective × Fairness × 5-HTTLPR                                                                                  | 1         | .013     | .908     | .000       |
| Perspective × Fairness × DRD4                                                                                      | 1         | .875     | .356     | .023       |
| Perspective × Fairness × 5-HTTLPR × DRD4                                                                           | 1         | .309     | .581     | .008       |
| Error(Perspective×Fairness)                                                                                        | 37        |          |          |            |

*Note.* Gray shaded cells = statistically significant effects.
